# Supplementary material for: Assessing the Effect of Therapeutic Communication on Patient Satisfaction
Source: Research Square preprint supplement (doi:10.21203/rs.3.rs-8327720/v1), 2026-02-09
Supplement: Supplementary file 1 [file 30dc0a8e3df1a1d9932f7aee.docx]

**Section A: Demographic Details**

1. Age: _ years
2. Gender: ☐ Male ☐ Female ☐ Other
3. Level of Education: ☐ No formal education ☐ Primary ☐ Secondary ☐ Graduate ☐ Postgraduate

**Section B: Clinical Communication Assessment**

(Instructions for response: Please respond using a 5-point Likert scale, where 1 = “Strongly Agree” and 5 = “Strongly Disagree”)

1. The dentist welcomed me well and made me feel comfortable. [1 2 3 4 5]
2. During the procedure, the dentist-maintained eye contact while speaking with me. [1 2 3 4 5]
3. When I was expressing my thoughts, the dentist listened attentively without interrupting. [1 2 3 4 5]
4. The dentist explained the treatment procedure very well. [1 2 3 4 5]
5. The dentist’s explanation was clear and straightforward. [1 2 3 4 5]
6. The dentist asked if I had any questions and encouraged me to ask them. [1 2 3 4 5]
7. The dentist reassured me and helped reduce my fear. [1 2 3 4 5]
8. How would you rate the dentist’s communication? [1 2 3 4 5]
9. If you experienced any discomfort during the procedure, how satisfied were you with the efforts made to relieve it? [1 2 3 4 5]
10. How satisfied were you with the explanations provided by the dentist? [1 2 3 4 5]
11. What was your overall level of satisfaction with this visit? [1 2 3 4 5]
12. Based on this experience, would you recommend this dentist/hospital to others? [1 2 3 4 5]

**Section D: Additional Suggestions**

1. What did you like the most about the dentist’s communication style?

(Open-ended response)

1. What changes would you suggest to the dentist regarding their communication style?

(Open-ended response)
